## Oxygen tension regulates lysosomal activation and receptor tyrosine kinase degradation

Jaewoo Hong, Todd R. Wuest, Yongfen Min and P. Charles Lin\*

Cancer and Inflammation Program, Center for Cancer Research, National Cancer Institute, Frederick, Maryland, 21702, United States of America

\*Correspondence to: [p.lin@nih.gov](mailto:p.lin@nih.gov)

**Abstract:** Oxygen sensing is crucial for adaptation to variable habitats and physiological conditions. Low oxygen tension, or hypoxia, is a common feature of solid tumors and hypoxic tumors are often more aggressive and resistant to therapy. Here we show that, in mammalian tissue culture cells, hypoxia suppressed lysosomal acidification/activation and receptor tyrosine kinase (RTK) degradation. Hypoxia down-regulated mTORc1, reducing its ability to activate transcription factor EB (TFEB), a master regulator of v-ATPase, the lysosomal proton pump. Hypoxia prevented epidermal growth factor receptor (EGFR) degradation in tumor tissues, whereas activation of lysosomes enhanced tumor cell response to anti-EGFR treatment. Our results link oxygen tension and lysosomal activity, provide a molecular explanation of the malignant phenotype associated with hypoxic tumors, and suggest activation of lysosomes may provide therapeutic benefit in RTK-targeted cancer therapy.

**One Sentence Summary:** Hypoxia suppresses lysosomal activation and proteolysis.

Hypoxia is a condition in which the body, or a region of the body, is deprived of an adequate oxygen supply. It is a common stress associated with various pathological conditions, ranging from cardiovascular disorders to cancer, and affects many cellular and molecular activities, as well as a range of therapeutic responses (1, 2). Lysosomes are membrane-enclosed organelles containing abundant acid hydrolases (3). Lysosomes maintain an acidic environment principally by pumping protons in from the cytosol *via* the vacuolar (v) H<sup>+</sup>-ATPase (4). The lysosome is a major component of the cellular degradation machinery, digesting damaged and abnormal proteins, as well as directing the proteolysis of cellular enzymes and regulatory proteins that are no longer needed, in order to maintain cellular homeostasis (5-7). RTKs are high affinity cell surface receptors for growth factors, cytokines and hormones, playing roles in

cell proliferation, differentiation and survival. Upon activation by ligand binding, receptors undergo endocytosis and lysosome-mediated receptor degradation to avoid excessive and prolonged signal activation (8, 9).

In studying the effect of hypoxia on RTK activity we identified a link between hypoxia and receptor signaling. Human endothelial cells (HUVECs) were cultured either in normoxic (20% O<sub>2</sub>) or hypoxic (1% O<sub>2</sub>) conditions in the presence or absence of growth factors. Ligand stimulation with recombinant EGF resulted in a reduction of EGF receptor (EGFR) levels in cells cultured in normoxia. Ligand stimulation failed to induce EGFR degradation in hypoxia (Figure 1A). We observed similar results in two epithelial tumor cell lines, HeLa and A549 (Figure 1A). Elevated EGFR levels in hypoxia led to increased receptor phosphorylation and activation of downstream signaling in both types of cells (Suppl. Fig 1A). Hypoxia also blocked VEGF-induced VEGFR2 reduction in endothelial cells (Suppl. Fig 1B). These findings reveal a general inhibitory role of hypoxia on RTK degradation.

The failure of receptor degradation under hypoxic conditions suggested that hypoxia plays a role in lysosomal function. We used Bafilomycin A1, a specific inhibitor of v-ATPase, to block lysosomal acidification/activation under normoxic conditions and observed that EGF-induced EGFR degradation was reduced in cultured endothelial cells, as well as epithelial HeLa cells and A549 cell lines after ligand stimulation, as seen in hypoxic conditions (Figure 1B). Addition of chloroquine, another lysosomal specific inhibitor, also blocked ligand stimulation induced VEGFR2 reduction in endothelial cells (Suppl. Fig 1C). These results suggest that hypoxia may suppress receptor degradation through the inhibition of lysosomal activity.

We examined if hypoxia affects lysosome acidification. Using LysoBrite, a dye that is specific for acidic organelles, we observed a significant reduction in the LysoBrite signal in cells cultured in hypoxic conditions. The hypoxic treatment also led to a reduction of Lamp2, a marker for lysosomes (Figure 1C). The acidification of lysosomes is generated by the action of v-ATPase (10, 11). We measured two catalytic components of v-ATPase, Atp6v1a and Atp6v1b2, in cells incubated under hypoxic conditions and observed a gradual reduction of both subunits, which correlated with an increase of EGFR (Figure 1D). Thus, the inhibitory effect of hypoxia on lysosomal acidification is caused by the reduction of v-ATPase.

To further establish the connection between the acidification of lysosomes by v-ATPase with ligand-induced receptor degradation, we knocked down Atp6v1b2 expression in cells.

Reduction of v-ATPase inhibited ligand-mediated receptor degradation, resulting in increased levels of EGFR (Figure 1E). Modest ectopic over-expression of Atp6v1a, or Atp6v1b2 in endothelial cells did not result in a significant change in EGFR levels. Over-expression of both components led to a substantial reduction of EGFR (Figure 1F). In epithelial cells, ectopic expression of either one of these v-ATPase subunits led to a clear reduction of EGFR, and over-expression of both produced a more pronounced response than either one alone (Figure 1F). The difference observed between endothelial and epithelial cells may reflect the difference of endogenous v-ATPase subunit levels in different types of cells.

Hypoxia inhibits mTOR activity through the TSC1/2 complex and REDD1 (*12-14*), and the mTOR pathway is involved in controlling v-ATPase assembly during dendritic cell maturation (*15*). We thus investigated if mTOR is responsible for hypoxia-mediated inhibition of v-ATPase expression. Hypoxia led to a reduction of both total mTOR and phosphorylated mTOR (Figure 2A), associated with increased EGFR levels (Figure 1D). Blocking mTOR activity with rapamycin significantly reduced the levels of v-ATPase subunits, which correlated with increased EGFR levels (Figure 2B). To determine which mTOR complex regulates the expression of v-ATPase, we purified pulmonary microvascular endothelial cells from mTORc1 (Rheb<sup>fllox/fllox</sup>) or mTORc2 (Rictor<sup>fllox/fllox</sup>) floxed mice, and infected them with adenoviral vectors for the Cre recombinase. Deletion of Rheb (mTORc1) but not Rictor (mTORc2) resulted in a reduction of Atp6v1a and Atp6v1b2 (Figure 2C). Treating endothelial cells with the mTORc1-specific inhibitors rapamycin and AZD2014 led to reduction of the acidification of lysosomes (Figure 2D). Activation of mTORc1 using MHY1485 increased acidification of lysosomes (Figure 2E). These results suggest that hypoxia inhibits lysosomal acidification/activation through suppression of mTORc1 mediated v-ATPase expression.

v-ATPase regulation by mTORc1 involves TFEB (*16*), which binds to the regulatory regions of many lysosomal genes, activating their expression (*17*). TFEB shuttles between the cytosol and nucleus, and nuclear translocation is required for its function. In normoxic cells, immunostaining for endogenous TFEB protein revealed the majority was in the nucleus, whereas it was mainly in the cytosol under hypoxic conditions, as was seen when cells were cultured in normoxia in the presence of an mTORc1 specific inhibitor (Suppl. Fig 2A). Addition of the mTORc1 activator, MHY1485 reversed the hypoxia-mediated blockade of TFEB nuclear

translocation (Suppl. Fig 2B). These findings suggest that hypoxia inhibits TFEB nuclear translocation *via* inhibition of mTOR, thereby preventing v-ATPase transcription.

TFEB phosphorylation regulates nuclear translocation. Both Serine 142 (S142) (18), and a serine-rich region at the C-terminus (<sub>462</sub>SSRRSSFS<sub>469</sub>) (16) have been implicated in TFEB nuclear translocation. To determine which site(s) is(are) responsible for hypoxia mediated translocation, we transfected cells with phospho-mimic or inhibitory mutants of TFEB, and subjected them to normoxia or hypoxia. Mutating S142 to either alanine or aspartic acid had no effect on TFEB nuclear translocation in response to hypoxia. Mutating all five serine residues at the C-terminus to alanines blocked TFEB nuclear translocation. Mutating them to aspartic acids led to spontaneous nuclear translocation of TEFB regardless the levels of oxygen (Figure 3A). To determine which serine residue(s) in this cluster is phosphorylated by mTORc1, we over-expressed Myc-tag TFEB in HeLa cells, followed by treatment with either vehicle, or MHY1485, or AZD2014, respectively. TFEB protein was pulled down with an anti-myc antibody and subjected to mass-spectrometry. Phosphorylation at S462 was detected in all three treatment groups, while phosphorylation at S463 only occurred after a stimulation with mTORc1 activator MHY1485 (Figure 3B). There was no detectable phosphorylation signal on any other serine residue in this cluster. S142 in TFEB was phosphorylated regardless the activation status of mTORc1 (Suppl. Fig 3).

To evaluate the role of phosphorylation at S463 on TFEB nuclear translocation, we mutated this serine to either alanine (S463A) or aspartic acid (S463D). As a control, we also mutated S462 to aspartic acid (S462D). The mutant constructs were transfected into HeLa cells followed by treatment with AZD2014. Blocking mTORc1 inhibited the nuclear translocation of wild-type TFEB, as well as the S462D mutant. However, AZD2014 failed to block S463D nuclear translocation (Figure 3C). Transfection of the S463A and S463D mutants into HeLa cells, and their exposure to either normoxic or hypoxic conditions, revealed the S463A mutant blocked TFEB nuclear translocation, and the S463D mutant spontaneously translocated to the nucleus, independent of oxygen tension (Figure 3D). Activation of mTORc1 with MHY1485 reversed the hypoxia-induces nuclear blockade of WT TFEB. S463D mutant spontaneously translocated to nucleus and S463A mutant failed to translocate to nucleus regardless of oxygen tension and mTOR activity (Suppl. Fig 4). Thus, mTORc1 phosphorylates TFEB at S463, and this phosphorylation is necessary and sufficient for hypoxia-mediated TFEB nuclear translocation.



Hypoxia is a hallmark of solid tumors and is positively correlated with invasive phenotypes, resistant to therapy and poor prognosis of cancer patients (19). RTKs are major drivers in cancer growth and progression, and RTK inhibitors are commonly used in cancer therapy. Since hypoxia blocks RTK degradation, hypoxic tumors may have elevated RTKs that contribute to the phenotypes associated with poor prognosis. Analyzing murine B16 melanoma tumor tissues, we found a positive correlation between hypoxia, measured by HIF-1 $\alpha$  accumulation, and EGFR levels. The hypoxic region had higher EGFR than the less hypoxic region of the tumor (Figure 4A). Analysis of human cancer tissues also revealed a strong correlation between EGFR levels and hypoxia in both colon and stomach cancer samples (Figure 4B). In addition, there is a positive correlation of hypoxia with phosphorylation of ERK, a downstream mediator of EGFR signaling (Figure 4C). To determine what drives elevated EGFR levels in hypoxic tumors, we incubated three different tumor cell lines plus one endothelial cell line in hypoxia or normoxia and measured transcription by qPCR. There was no statistical increase in EGFR transcript levels in the four cell lines. VEGF, a gene known to be regulated by hypoxia, was increased in all four cell lines subjected to hypoxia (Figure 4D). These findings suggest that increased RTK levels in hypoxic tumors are likely due to inhibited receptor degradation in lysosomes.

EGF signaling is involved in cell proliferation and cancer progression, and anti-EGF inhibitors are widely used in cancer therapy. Given that hypoxia blocked lysosomal mediated EGFR degradation, resulting in increased signaling, lysosomal activators should increase receptor degradation and provide therapeutic benefit in anti-RTK cancer therapy. To evaluate this idea, we ectopically expressed wild-type, S463D and S463A mutant of TFEB in three human cancer cell lines to increase lysosomal acidification/activation, and treated the cells with anti-EGFR inhibitors under hypoxia. Activation of lysosomes with the S463D significantly reduced cell proliferation in all three tumor lines. A combination of lysosomal activation and anti-EGFR inhibitors produced the strongest inhibition of all tumor cells (Figure 4E). In contrary, there is no differences between cells transfected with WT or S463A mutant as hypoxia blocks TFEB phosphorylation and nuclear translocation.

We demonstrate a critical function for oxygen tension in regulating lysosomal activation and proteolysis *via* the mTORc1-TFEB pathway. Hypoxia occurs during normal mammalian development and is involved in developmental morphogenesis. It is also associated with various pathological disorders, including ischemic cardiovascular diseases, stroke, and cancer. Lysosomes

are the terminal organelles on the endocytic pathway, serving both to degrade material taken up from outside the cell as well as biological polymers inside cells. We reveal an inhibitory function for hypoxia in lysosomal acidification, required for the activation of various hydrolytic enzymes responsible for breaking down of biological polymers. Thus, hypoxia blocks lysosomal activation and function, and this has broad implications for cell regulation and homeostasis under the hypoxic stress. RTKs are major drivers in cancer development and progression. Persistent activation of EGFR enables cancer cells to engage in autonomous proliferation, which is a critical hallmark of cancer (20). EGFR expression is a marker of advanced tumor stages, resistance to standard therapeutic approaches, and reduced patient survival (21). We show that hypoxic conditions suppress EGFR degradation in lysosomes and results in elevated signaling. Levels of EGFR and its downstream signaling are positively correlated with levels of hypoxia in both murine and human tumor tissues, suggesting that hypoxic tumors experience prolonged and enhanced signaling, allowing the tumor cells to survive and maintain homeostasis under stress. These findings may explain why hypoxic tumors tend to be more malignant, associated with poor prognosis, and are often resistant to therapy (22-24). RTK inhibitors may deliver a more potent therapeutic effect when combined with lysosomal activators. Initial analysis demonstrated that increase of lysosomal acidification could enhance or sensitize tumor cell response to an EGFR inhibitor, potentially providing a strategy for targeted cancer therapy.

## References and Notes:

1. G. L. Semenza *et al.*, Hypoxia, HIF-1, and the pathophysiology of common human diseases. *Adv Exp Med Biol* **475**, 123-130 (2000).
2. A. M. Shannon, D. J. Bouchier-Hayes, C. M. Condrón, D. Toomey, Tumour hypoxia, chemotherapeutic resistance and hypoxia-related therapies. *Cancer Treat Rev* **29**, 297-307 (2003).
3. C. De Duve, B. C. Pressman, R. Gianetto, R. Wattiaux, F. Appelmans, Tissue fractionation studies. 6. Intracellular distribution patterns of enzymes in rat-liver tissue. *Biochem J* **60**, 604-617 (1955).
4. J. A. Mindell, Lysosomal acidification mechanisms. *Annu Rev Physiol* **74**, 69-86 (2012).
5. A. Ciechanover, Proteolysis: from the lysosome to ubiquitin and the proteasome. *Nat Rev Mol Cell Biol* **6**, 79-87 (2005).
6. C. Settembre, A. Fraldi, D. L. Medina, A. Ballabio, Signals from the lysosome: a control centre for cellular clearance and energy metabolism. *Nat Rev Mol Cell Biol* **14**, 283-296 (2013).
7. J. A. Bertout, S. A. Patel, M. C. Simon, The impact of O<sub>2</sub> availability on human cancer. *Nat Rev Cancer* **8**, 967-975 (2008).

8. L. K. Goh, A. Sorkin, Endocytosis of receptor tyrosine kinases. *Cold Spring Harb Perspect Biol* **5**, a017459 (2013).
9. H. A. Alwan, E. J. van Zoelen, J. E. van Leeuwen, Ligand-induced lysosomal epidermal growth factor receptor (EGFR) degradation is preceded by proteasome-dependent EGFR de-ubiquitination. *J Biol Chem* **278**, 35781-35790 (2003).
10. M. Forgac, Vacuolar ATPases: rotary proton pumps in physiology and pathophysiology. *Nat Rev Mol Cell Biol* **8**, 917-929 (2007).
11. V. Marshansky, M. Futai, The V-type H<sup>+</sup>-ATPase in vesicular trafficking: targeting, regulation and function. *Curr Opin Cell Biol* **20**, 415-426 (2008).
12. A. M. Arsham, J. J. Howell, M. C. Simon, A novel hypoxia-inducible factor-independent hypoxic response regulating mammalian target of rapamycin and its targets. *J Biol Chem* **278**, 29655-29660 (2003).
13. J. Brugarolas *et al.*, Regulation of mTOR function in response to hypoxia by REDD1 and the TSC1/TSC2 tumor suppressor complex. *Genes Dev* **18**, 2893-2904 (2004).
14. J. H. Reiling, E. Hafen, The hypoxia-induced paralogs Scylla and Charybdis inhibit growth by down-regulating S6K activity upstream of TSC in Drosophila. *Genes Dev* **18**, 2879-2892 (2004).
15. R. Liberman, S. Bond, M. G. Shainheit, M. J. Stadecker, M. Forgac, Regulated assembly of vacuolar ATPase is increased during cluster disruption-induced maturation of dendritic cells through a phosphatidylinositol 3-kinase/mTOR-dependent pathway. *J Biol Chem* **289**, 1355-1363 (2014).
16. S. Pena-Llopis *et al.*, Regulation of TFEB and V-ATPases by mTORC1. *EMBO J* **30**, 3242-3258 (2011).
17. M. Sardiello *et al.*, A gene network regulating lysosomal biogenesis and function. *Science* **325**, 473-477 (2009).
18. C. Settembre *et al.*, TFEB links autophagy to lysosomal biogenesis. *Science* **332**, 1429-1433 (2011).
19. G. L. Semenza, Defining the role of hypoxia-inducible factor 1 in cancer biology and therapeutics. *Oncogene* **29**, 625-634 (2010).
20. D. Hanahan, R. A. Weinberg, The hallmarks of cancer. *Cell* **100**, 57-70 (2000).
21. J. Mendelsohn, J. Baselga, The EGF receptor family as targets for cancer therapy. *Oncogene* **19**, 6550-6565 (2000).
22. P. Vaupel, Hypoxia and aggressive tumor phenotype: implications for therapy and prognosis. *Oncologist* **13 Suppl 3**, 21-26 (2008).
23. P. Vaupel, A. Mayer, Hypoxia in cancer: significance and impact on clinical outcome. *Cancer Metastasis Rev* **26**, 225-239 (2007).
24. M. Hockel, P. Vaupel, Tumor hypoxia: definitions and current clinical, biologic, and molecular aspects. *J Natl Cancer Inst* **93**, 266-276 (2001).
25. L. M. DeBusk, K. Boelte, Y. Min, P. C. Lin, Heterozygous deficiency of delta-catenin impairs pathological angiogenesis. *J Exp Med* **207**, 77-84 (2010).

**Acknowledgments:** We thank Steve Anderson and Jairaj Acharya at the NCI for proof reading. This research was supported by the Intramural Research Program of the Center for Cancer Research, National Cancer Institute, National Institutes of Health.

## Figure legends

### **Figure 1. Hypoxia inhibits lysosomal activity *via* suppression of v-ATPase expression.**

HUVECs, HeLa and A549 were serum-starved overnight, followed by stimulation with 50 ng/ml of EGF under 20% or 1% oxygen conditions for 5 hours. Cell lysates were used to measure EGFR levels by Western blot (A). Serum starved cells were treated with 50 ng/ml of EGF in the presence or absence of 100 nM of Bafilomycin A1 for 5 hours, followed by Western blot for EGFR (B). HUVECs were incubated in either 20% or 1% O<sub>2</sub> in the presence of LysoBrite-NIR for 4 hours. Cells were fixed and immunostained for Lamp2 (C). Images were collected from confocal microscopy. Representative images were shown. HUVECs were cultured in 1% O<sub>2</sub> for the indicated times, followed by Western blot (D). HUVECs were infected with ATP6V1B2 shRNA lentiviral or control vectors (E), or infected with lentiviral vectors for ATP6V1A and/or ATP6V1B2, for 2 days (F). The cells were serum-starved overnight followed by stimulation with 50 ng/ml of EGF for 5 hours.

### **Figure 2. Hypoxia suppresses lysosomal acidification through mTORc1.**

HUVECs were incubated in 1% O<sub>2</sub> for the indicated times, and phospho- and total mTOR levels were detected from cell lysates (A). HUVECs were treated with 10 or 50 nM of rapamycin overnight. Cell lysates were subjected to Western blot (B). Lung endothelial cells were isolated from RHEB- or RICTOR-floxed mice followed by infection with GFP or Cre expressing adenoviral vectors for 24 hours, followed by Western blot (C). HUVECs were incubated in the presence of LysoBrite-NIR in the presence or absence of 10 nM of rapamycin or AZD2014 to block mTORc1(D), or in the presence or absence of 2 μM of MHY1485 to activate mTORc1(E), overnight. Wheat germ agglutinin (WGA) was used for counter staining. Images were collected from confocal microscopy. Representative images were shown.

### **Figure 3. mTORc1 phosphorylates TFEB at S463.**

HeLa cells transfected with myc tagged WT or TFEB mutant constructs were incubated in either 20% or 1% O<sub>2</sub> for 24 hrs, followed by immunostaining using myc antibody (A). HeLa cells transfected with TFEB-myc expression vectors for 1 day, followed by stimulation with vehicle control, 2 μM of MHY1485 or 10nM of AZD2014 for 30 minutes. TFEB was immunoprecipitated with antibodies against the Myc tag, followed by

mass-spectrometry analysis (B). HeLa cells transfected with S462D or S463D mutants were stimulated with vehicle or 10nM of AZD2014 for 30 minutes, and followed by immunostaining for TFEB (C). HeLa cells transfected with S463A or S463D mutants were incubated in 20% or 1% O<sub>2</sub> for 4 hrs, and followed by immunostaining for TFEB (D). Images were collected from confocal microscopy. Representative images were shown.

**Figure 4. Activation of lysosomes enhances tumor cell response to anti-EGFR inhibition.**

Cryosectioned murine B16 melanoma tissues were stained with antibodies against EGFR and HIF-1 $\alpha$  and imaged with confocal microscopy (A). Paraffin sections of human colon and stomach cancer tissues were stained against EGFR and HIF-1 $\alpha$  (B) and p-ERK and HIF-1 $\alpha$  (C), and imaged with confocal microscopy. Representative images were shown. HUVEC, A549, HeLa and DLD-1 were incubated in 20% or 1% O<sub>2</sub> for 5 hours. The mRNA levels of EGFR and VEGF were measured by qPCR (D). \* $p$ <0.05, \*\* $p$ <0.01. Human tumor cells transfected with WT TFEB, or S463A and S463D mutant expression vectors were treated with control IgG or anti-EGFR antibodies at 10  $\mu$ g/ml overnight. Cell proliferation was measured by the XTT assay (E). \* $p$ <0.05, \*\* $p$ <0.01, \*\*\* $p$ <0.001. The experiment was done in triplicates and repeated twice.

Fig. 1

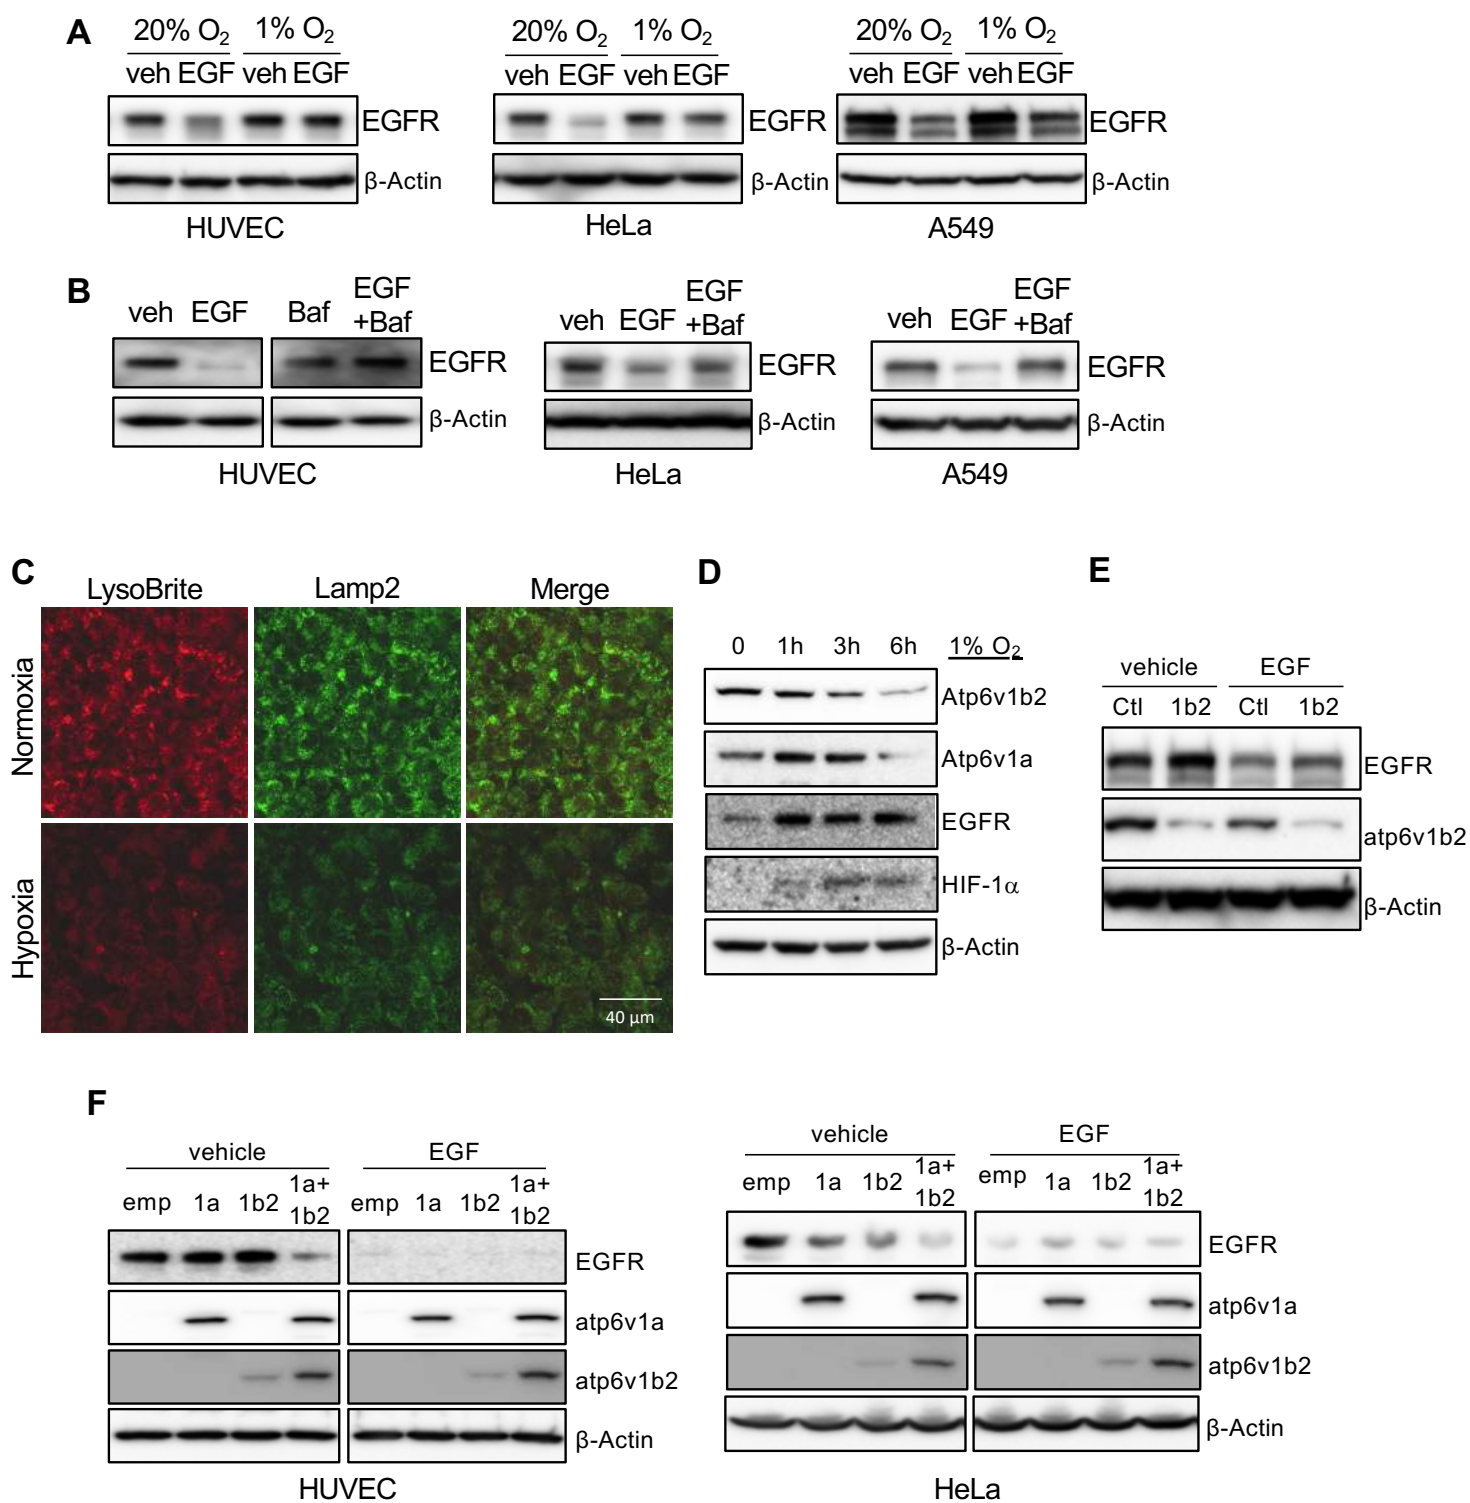



Fig. 2

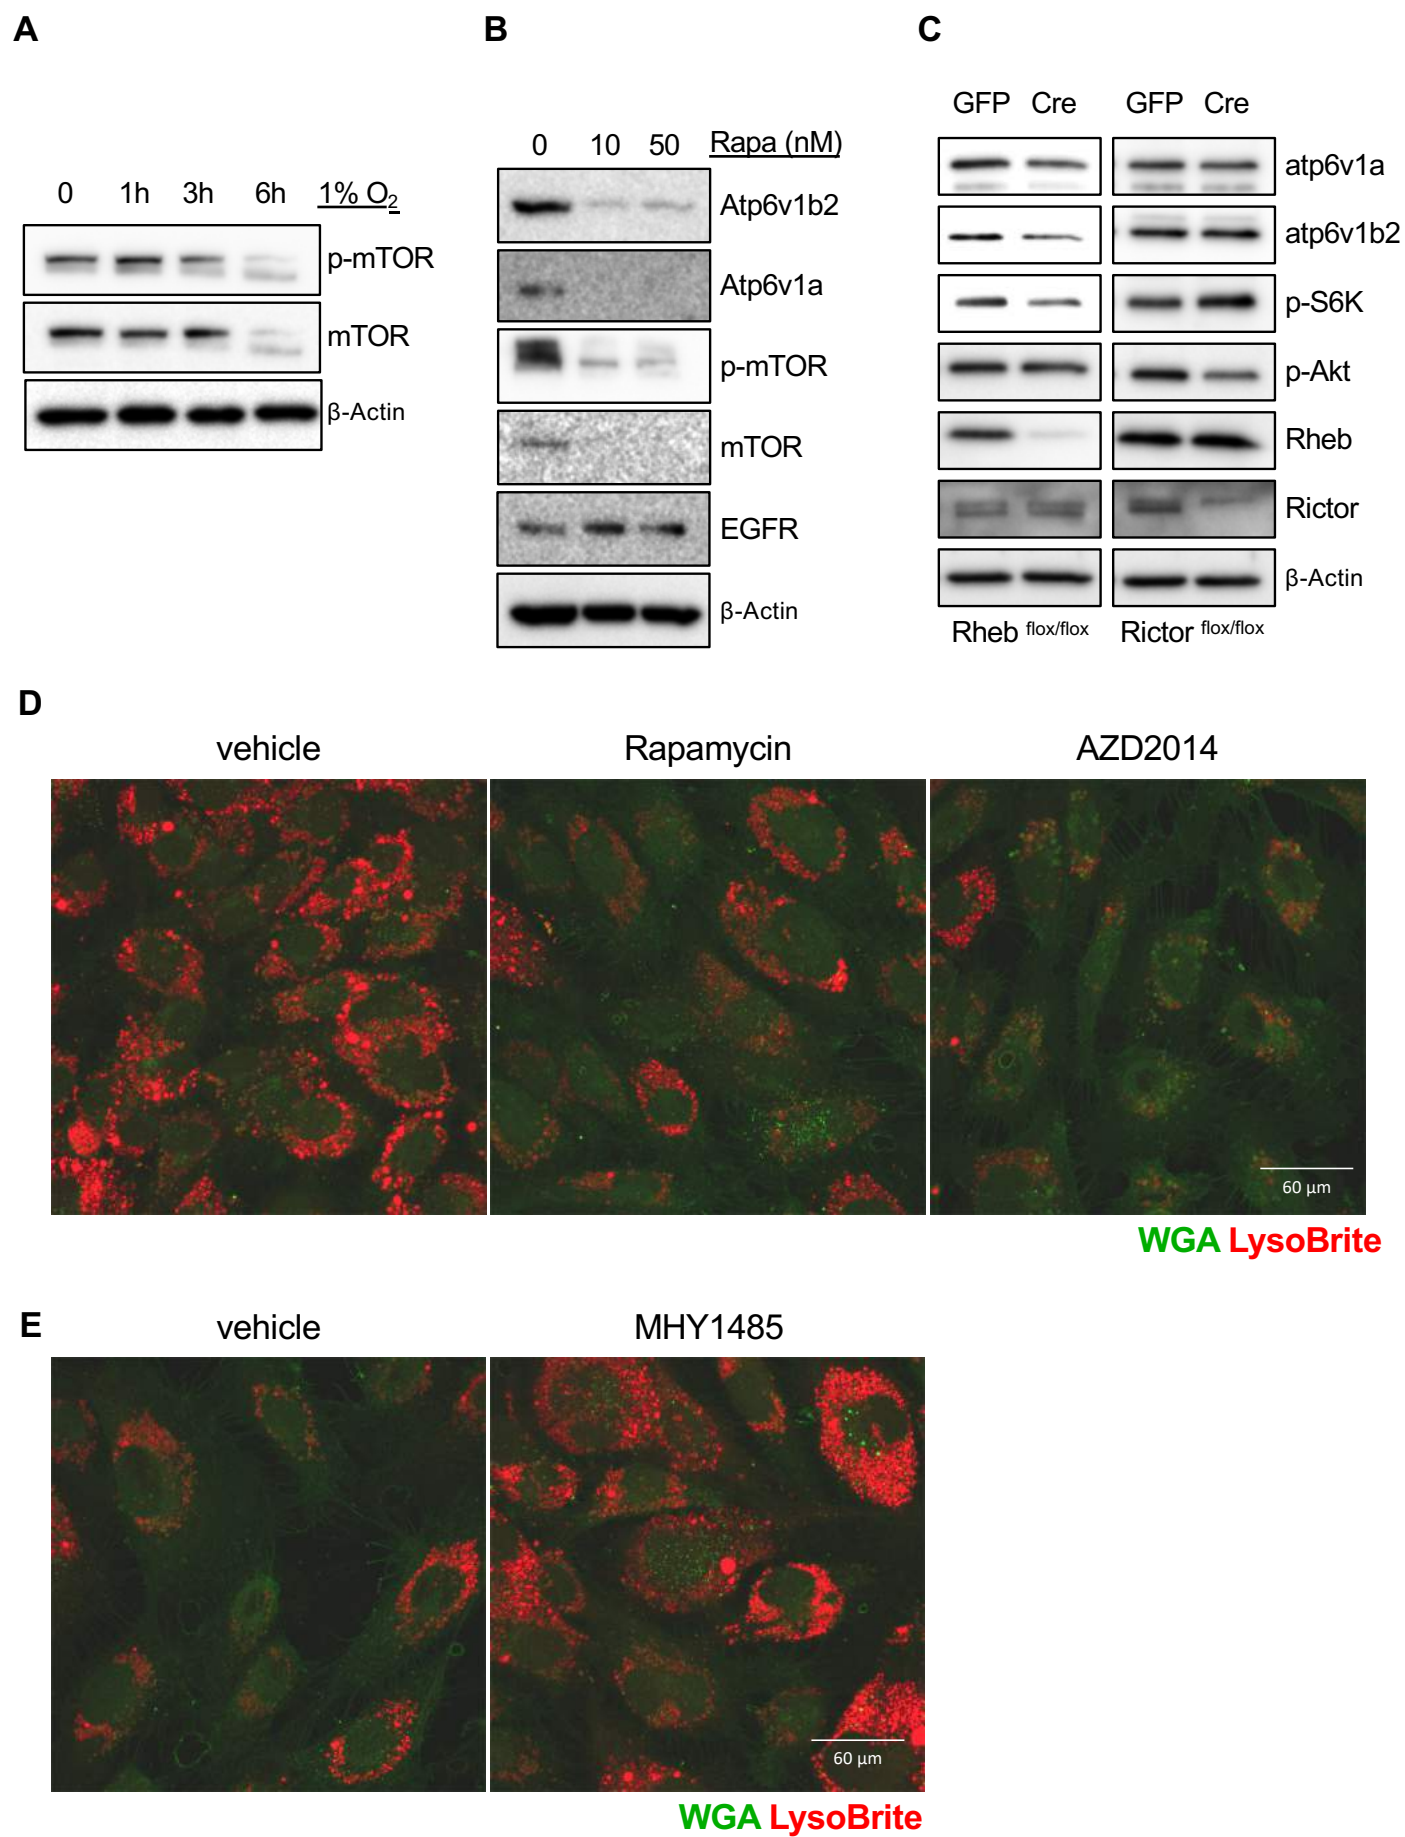

Fig. 3

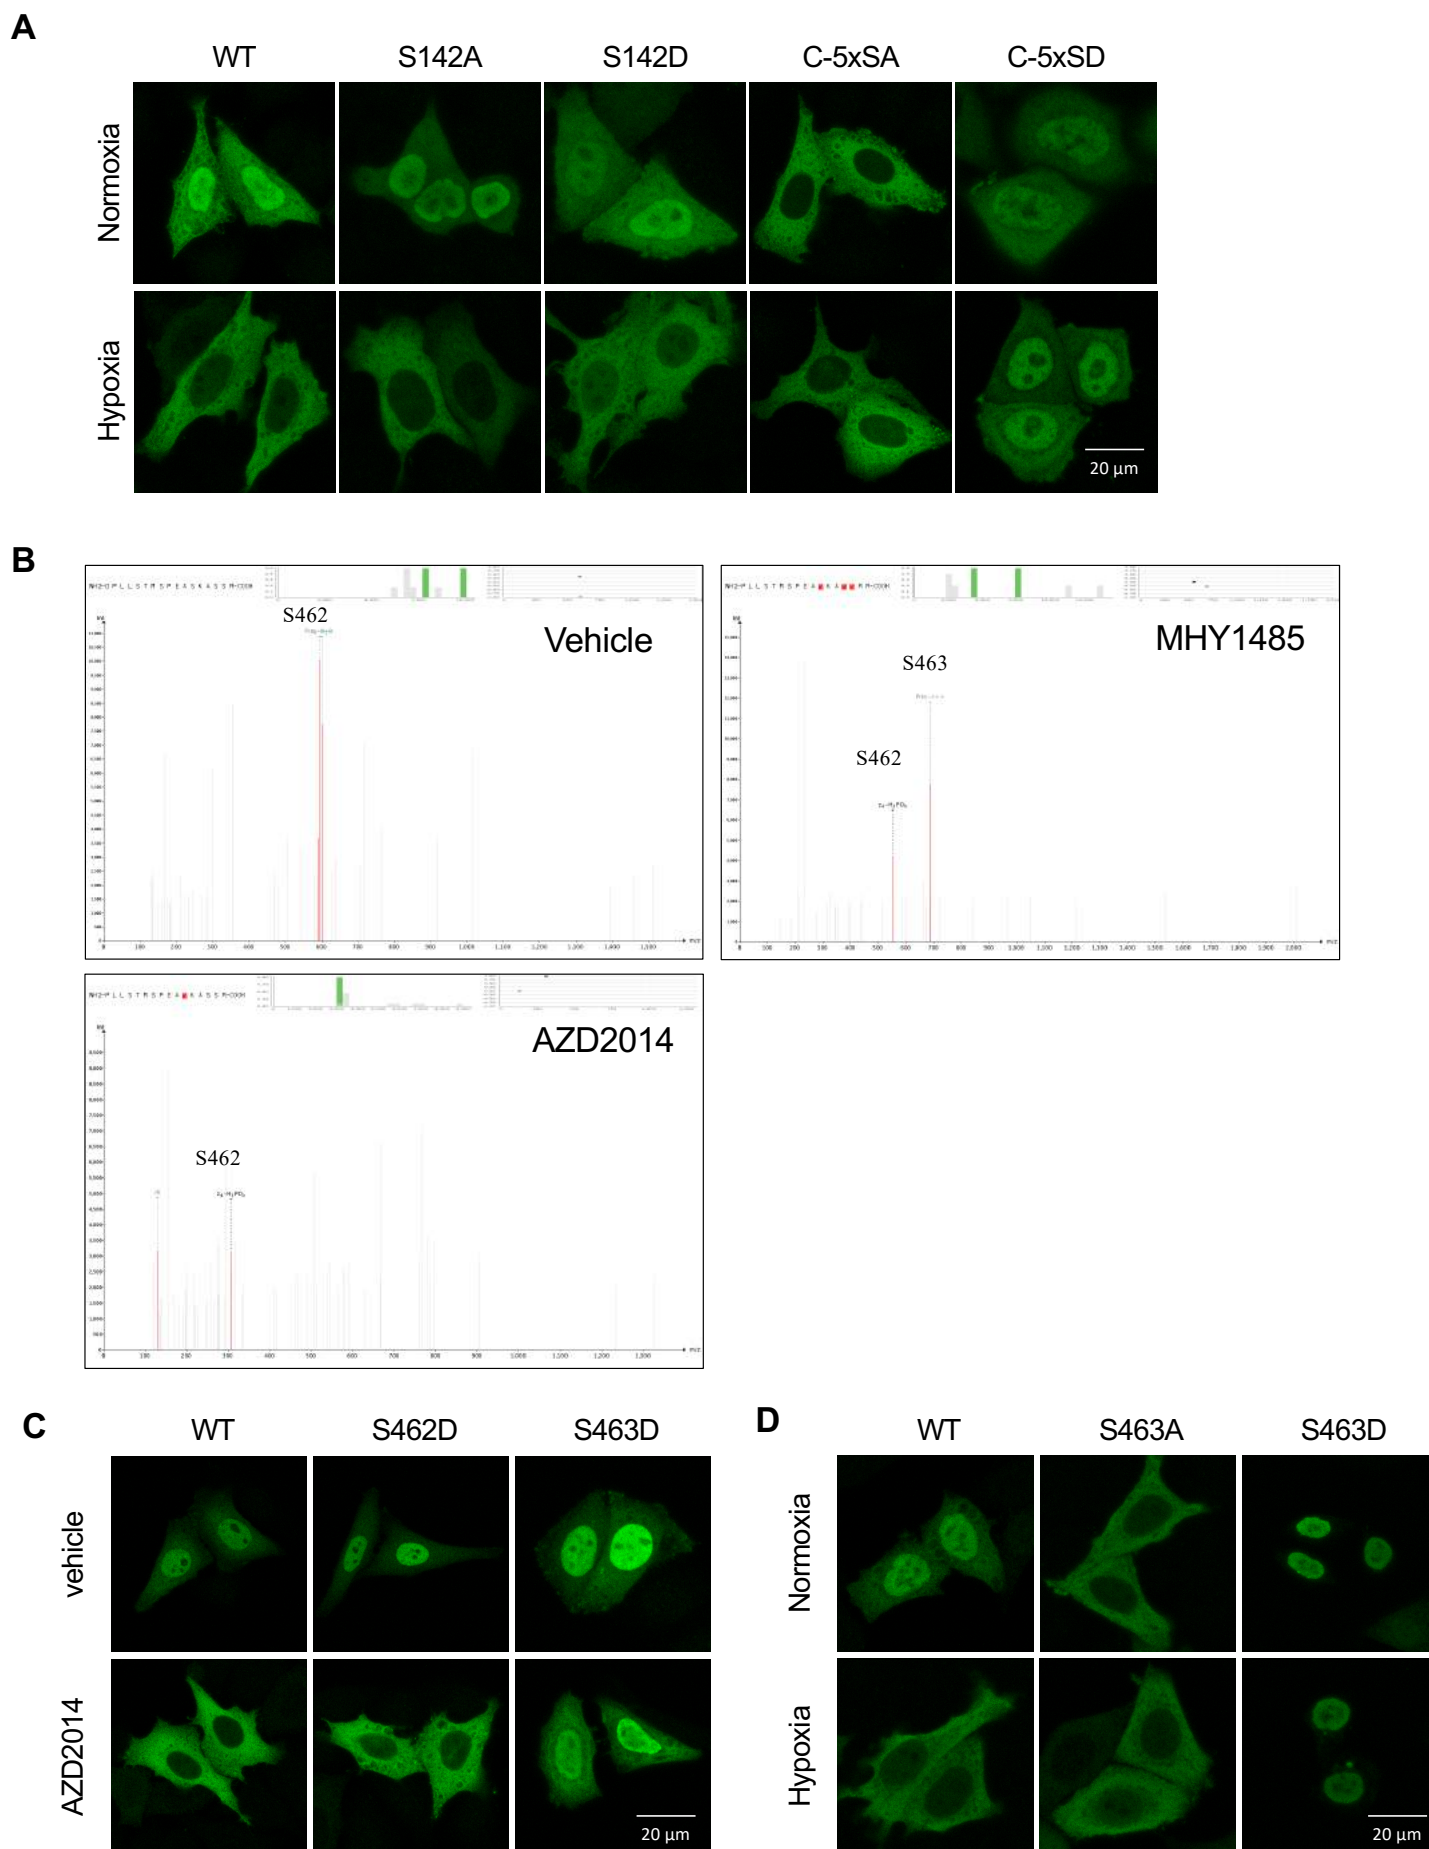

Fig. 4

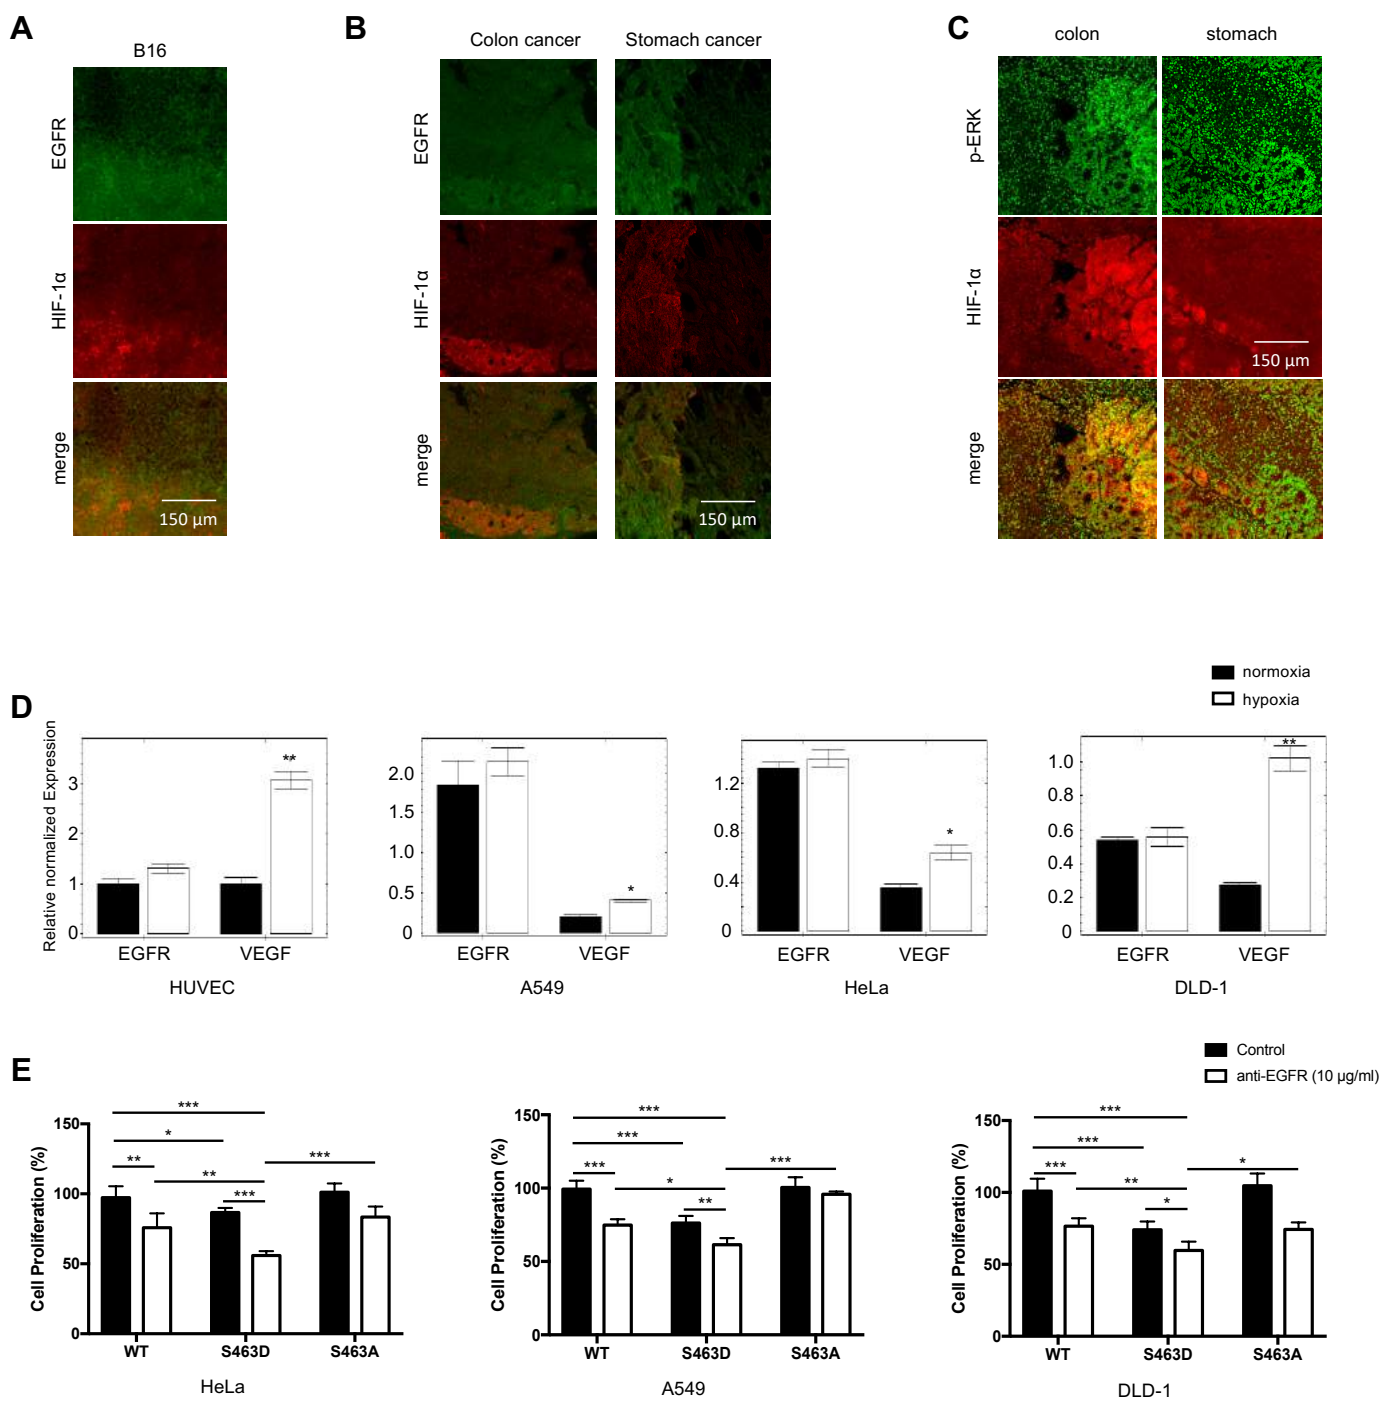

Source: https://www.biorxiv.org/content/10.1101/727495v1.full.pdf
